# Supplementary material for: Engineering of graphene/epoxy nanocomposites with improved distribution of graphene nanosheets for advanced piezo-resistive mechanical sensing
Source: Royal Society of Chemistry journal article supplement (doi:10.1039/c6tc00607h), 2016-01-01
Supplement: c6tc00607h1.pdf [file c6tc00607h1.pdf]

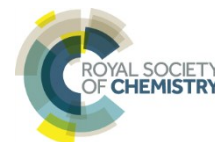

Received 00th January 20xx,  
Accepted 00th January 20xx

DOI: 10.1039/x0xx00000x

[www.rsc.org/](http://www.rsc.org/)

## Supporting information

### Engineering of Graphene/Epoxy Nanocomposites with improved distribution of Graphene nanosheets for advanced Piezo-resistive mechanical Sensing

Tran Thanh Tung<sup>a</sup>, Ramesh Karunagaran<sup>a</sup>, Diana N. H. Tran<sup>a</sup>, Boshi Gao<sup>a</sup>, Suswam<sup>b</sup>, Isabella Pillin<sup>b</sup>,  
Jean-Francois Feller<sup>b</sup>, Dusan Losic<sup>a</sup>

- (a) School of Chemical engineering, the University of Adelaide, Adelaide, 5005 North Terrace, South Australia  
(b) Smart Plastics Group, European University of Brittany (UEB), LIMATB-UBS, rue de Saint-Maude', 56321 Lorient, France

<sup>a</sup> School of Chemical engineering, the University of Adelaide, Adelaide, 5005 North Terrace, South Australia

<sup>b</sup> Smart Plastics Group, European University of Brittany (UEB), LIMATB-UBS, rue de Saint-Maude', 56321 Lorient, France

\* Corresponding: Prof. Dusan Losic ; email: [dusan.losic@adelaide.edu.au](mailto:dusan.losic@adelaide.edu.au)

Electronic Supplementary Information (ESI) available: [details of any supplementary information available should be included here]. See DOI: 10.1039/x0xx00000x

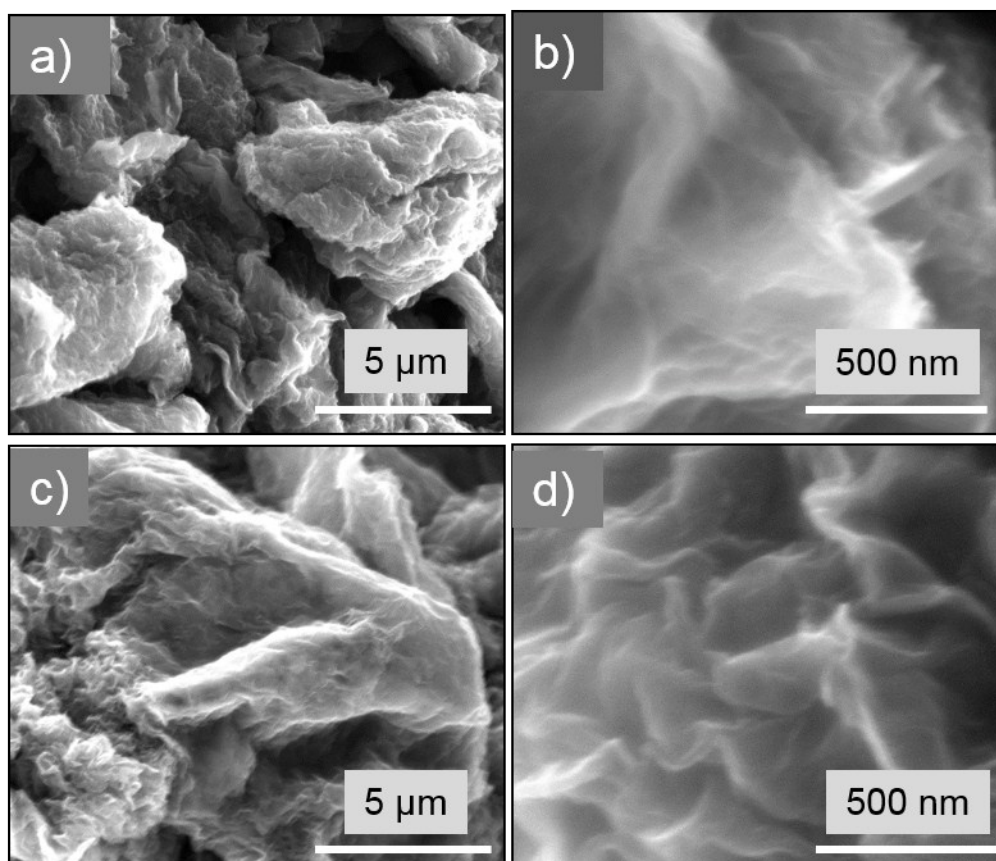

Figure S1. SEM images of RGO only (a and b) and DMBA-modified RGO (c and d) dried powders showing aggregated form without observed porous structure. They are definitely negative effect to the dispersion when preparing the composite with epoxy resin.

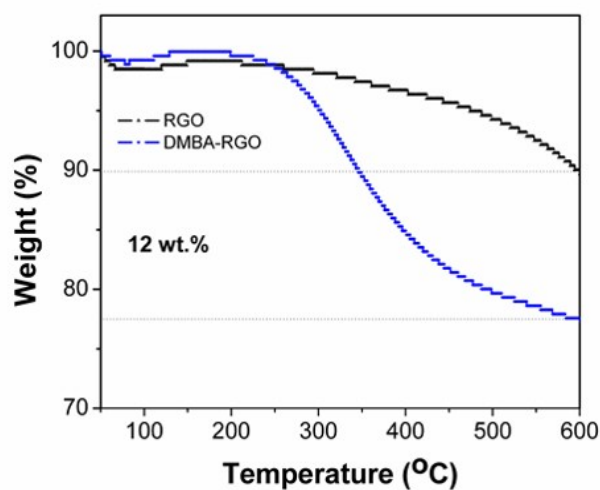

Figure S2. A comparison TGA data of RGO (black curve) and DMBA-modified RGO (blue curve) showing amount of DMBA the product

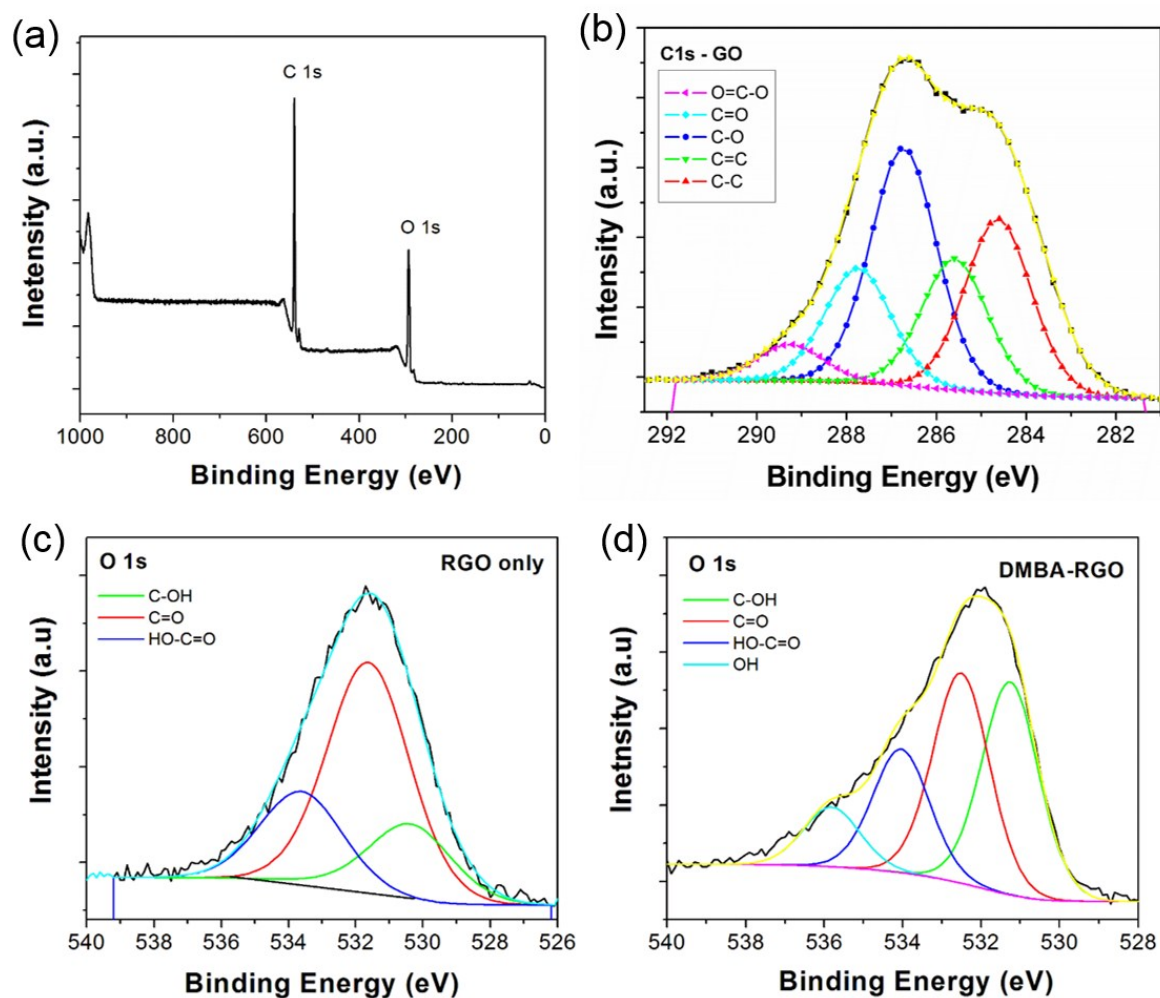

Figure S3. A comparative O1s XPS spectra of (a) RGO and (b) DMBA-RGO

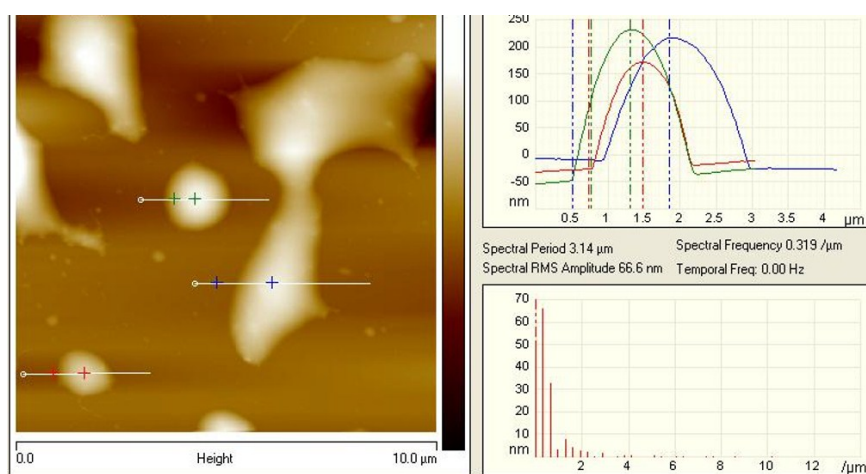

Figure S4. AFM image of the RGO-DMBA/epoxy suspension under low speed spin-coating of 1000 rpm showing composite topography, but not easy to get the information of graphene sheets since it is embedded inside

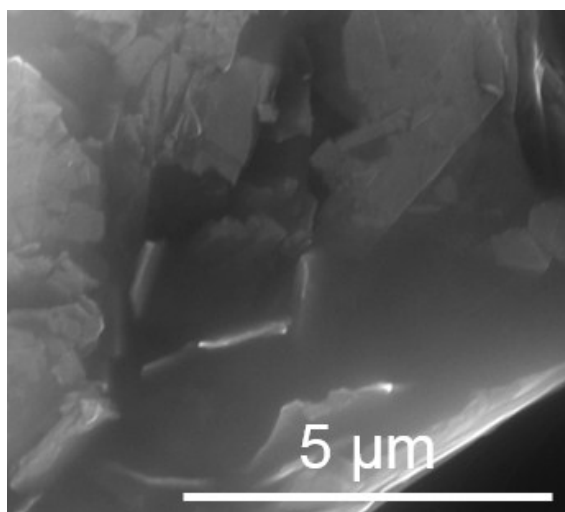

Figure S5. Micrograph of RGO platelets-epoxy composite showing inhomogeneous distribution of stacked RGO clusters in epoxy matrix, it seems separated phase between them

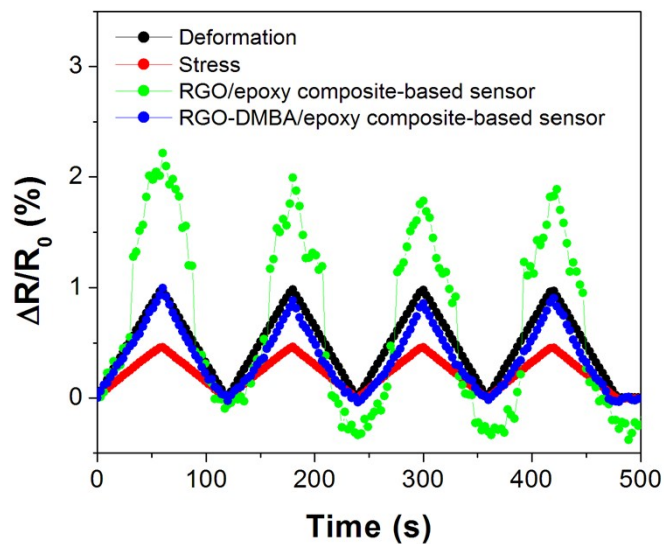

Figure S6. A comparison sensing response test of composite sensor with and without modification of RGO with DMBA hardener. It is showing that RGO/epoxy composite –based sensor responses to applied strain in unstable way and high level of signal to noise ratio, also it has drift between successive cycles. In contrast, RGO-DMBA/epoxy composite-based sensor showed excellent response towards external stimuli
